# Supplementary material
Source: publisher figshare collection journal article supplement (https://tandf.figshare.com/ndownloader/files/16219472)
Supplement: Supplementary file 1 [file 16219472]

Supplemental Information,
Design and optimization of a Medium Flow Differential Mobility Analyzer (MF-DMA) for classification of high-density particles

T. Rosenberger1, D. Kiesler1, E. Hontañón1, D. Fuentes2, E. Ramiro2, and F.E. Kruis1

1Intitute of Technology for Nanostructures (NST) and Center for Nanointegration Duisburg-Essen (CENIDE), University Duisburg-Essen, Duisburg, D-47057, Germany

2Ramem S.A., Madrid, 28027, Spain

| 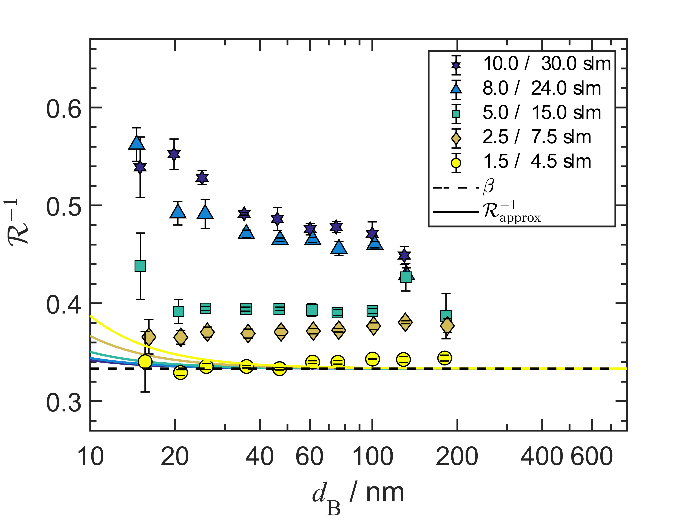 | 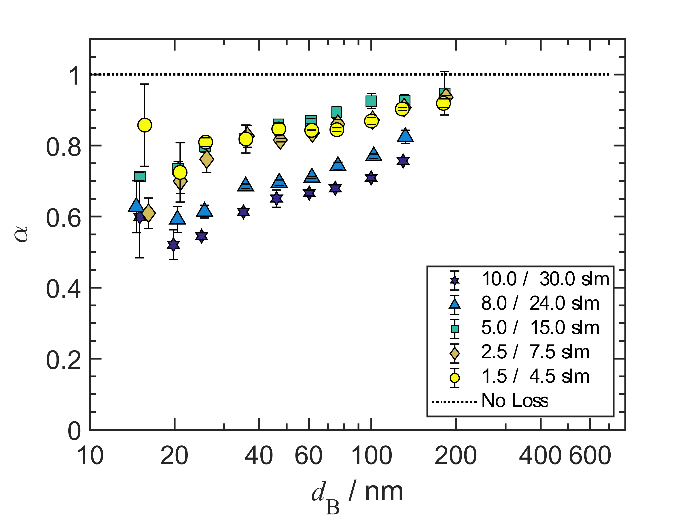 |
| --- | --- |
| *Figure S1 Width (left) and the height (right) of the transfer function of the Short MF-DMA for a flow ratio and an aerosol inlet gap of 1 mm.* | |
| 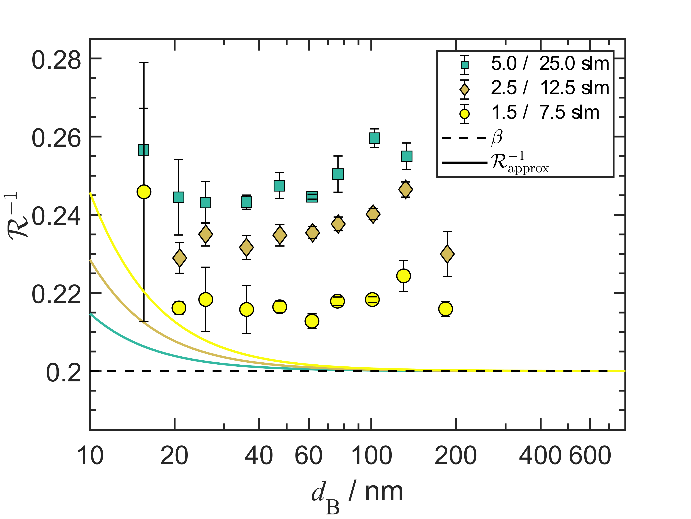 | 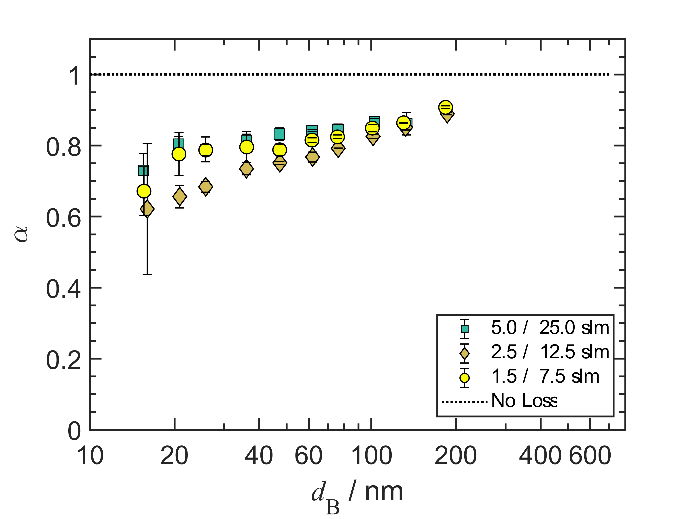 |
| *Figure S2 Width (left) and the height (right) of the transfer function of the Short MF-DMA for a flow ratio and an aerosol inlet gap of 1 mm.* | |
| 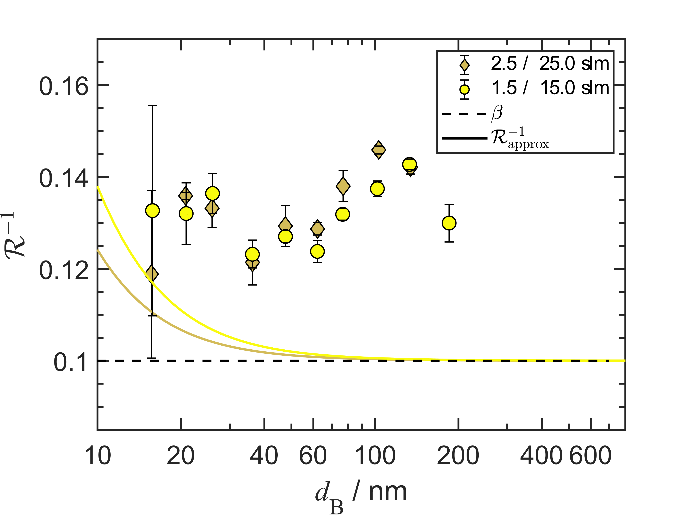 | 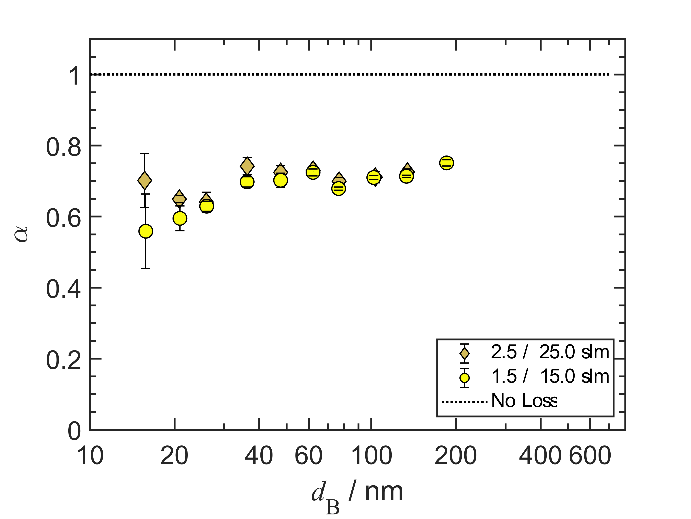 |
| *Figure S3 Width (left) and the height (right) of the transfer function of the Short MF-DMA for a flow ratio and an aerosol inlet gap of 1 mm.* | |
| 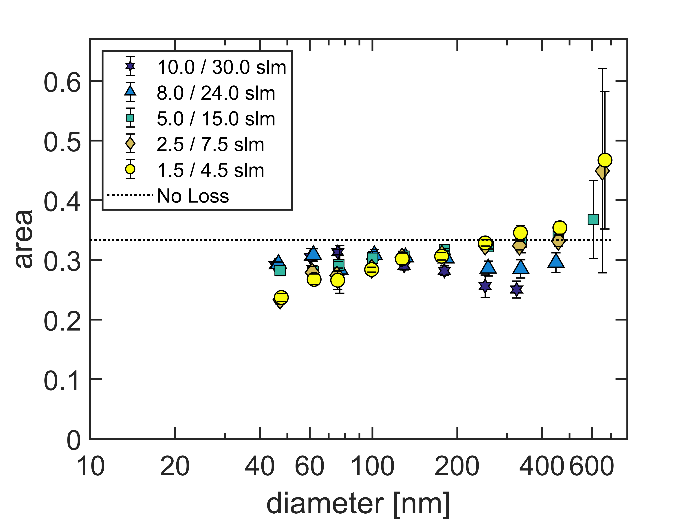 | 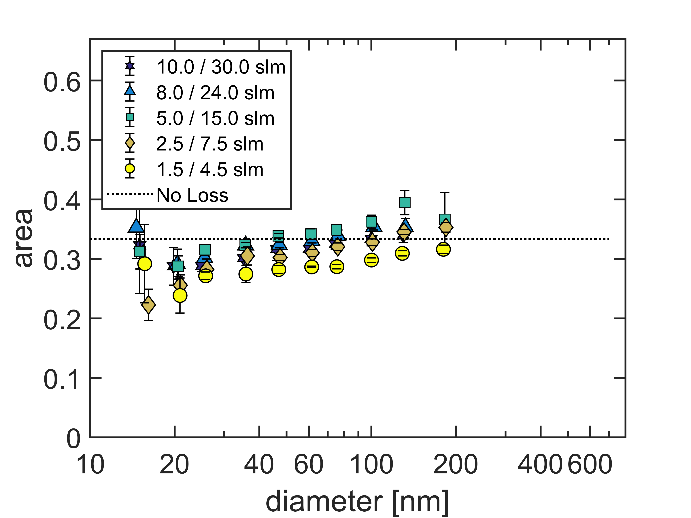 |
| *Figure S4 Area plot of the transfer function of the Long MF-DMA (left) and the Short MF-DMA (right) for a flow ratio and an aerosol inlet gap of 1 mm.* | |
| 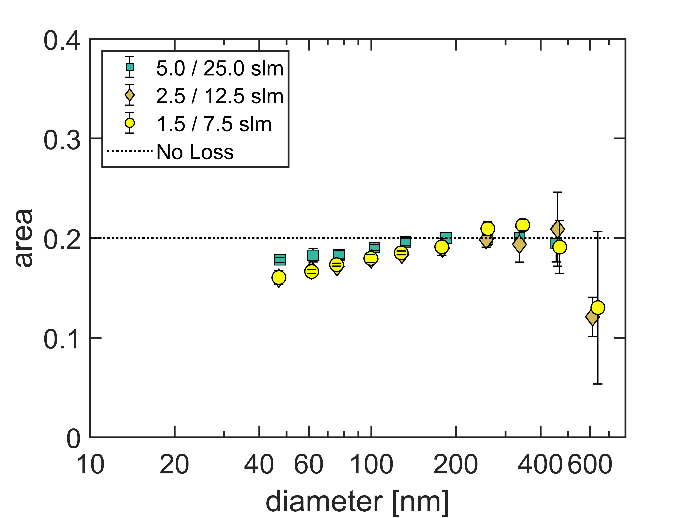 | 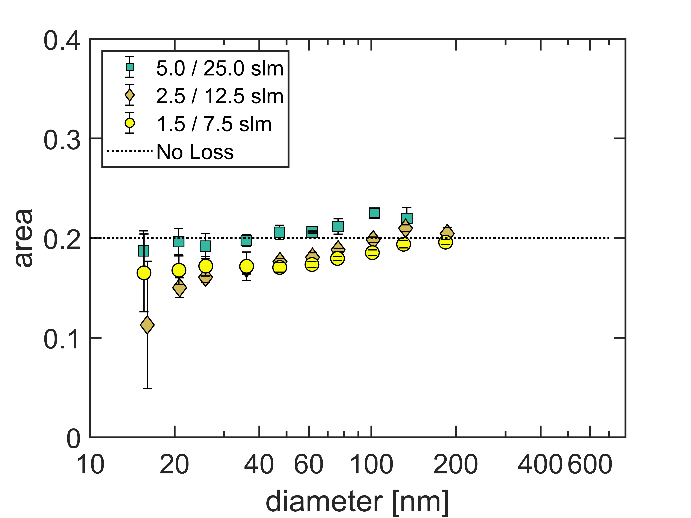 |
| *Figure S5 Area plot of the transfer function of the Long MF-DMA (left) and the Short MF-DMA (right) for a flow ratio and an aerosol inlet gap of 1 mm.* | |
| 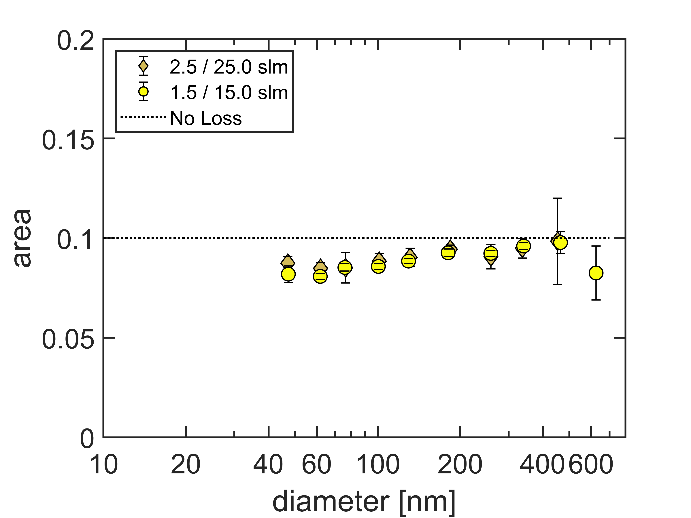 | 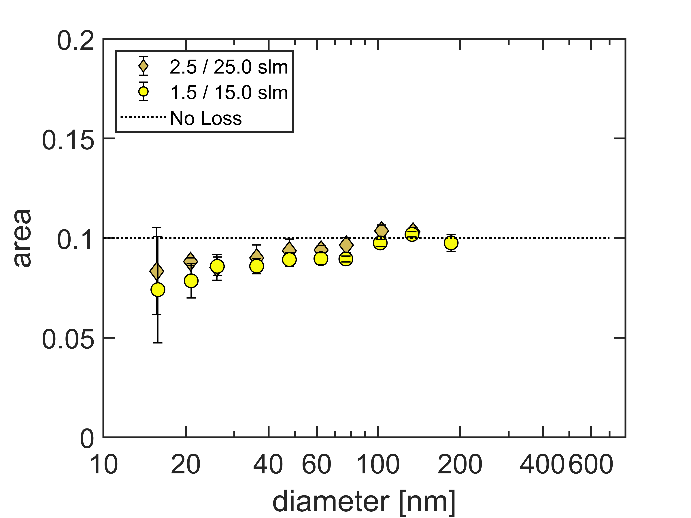 |
| *Figure S6 Area plot of the transfer function of the Long MF-DMA (left) and the Short MF-DMA (right) for a flow ratio and an aerosol inlet gap of 1 mm.* | |
